# Supplementary material for: Mesoporous SiO2 based nanocomplex enzymes for enhanced chemodynamic therapy of pancreatic tumors
Source: Royal Society of Chemistry journal article supplement (doi:10.1039/d4nr02406k), 2025-01-01
Supplement: d4nr02406k1.pdf [file d4nr02406k1.pdf]

Figure S1. DLS analysis of mSiO<sub>2</sub> particle size.

Figure S2. Zeta potential measurements for functionalized mSiO<sub>2</sub> products.

Figure S3. TEM images of nanoparticle degradation over time in the tumor microenvironment.

Figure S4. Cell viability of PANC-1 cells detected by CCK-8 assay after treated with WT genistein and KMnO<sub>4</sub> treated genistein. ns: no significance.

Figure S5. The flow cytometry apoptosis experiments. \*\*\*  $p < 0.001$  vs Control.

Figure S6. JC-1 staining experiments

Figure S7. The ROS levels as detected by MitoSOX.\*  $p < 0.05$  vs Control.

Figure S8. The images of all tumor tissues.
