# Supplementary figures and images for: Mesoporous SiO2 based nanocomplex enzymes for enhanced chemodynamic therapy of pancreatic tumors
Source: Royal Society of Chemistry journal article supplement (doi:10.1039/d4nr02406k), 2025-01-01

**Figure S1**

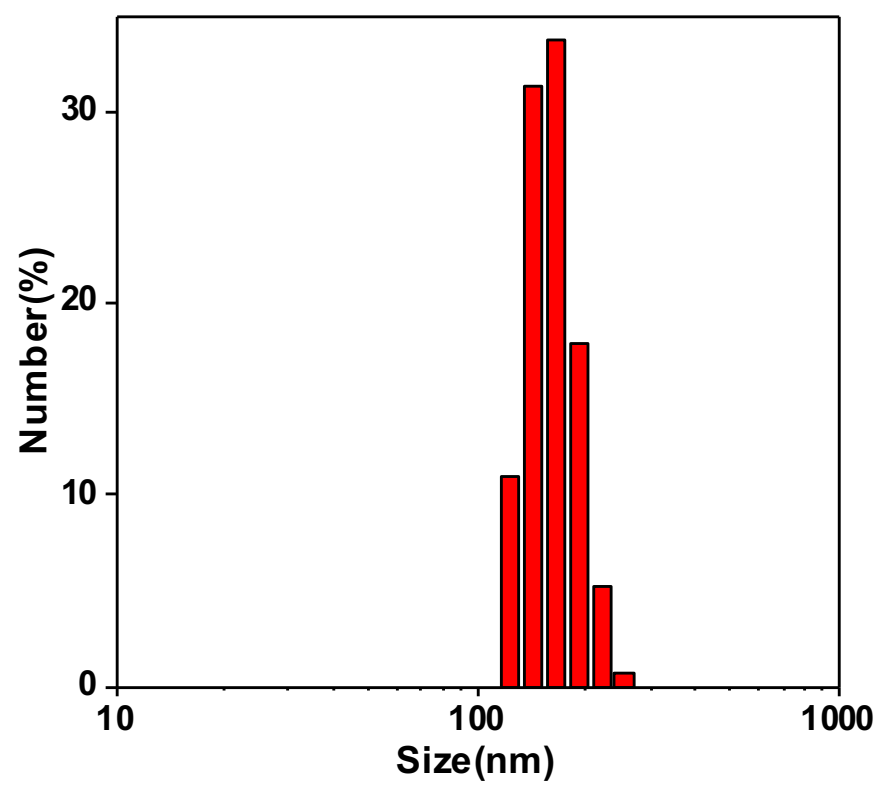

**Figure S2**

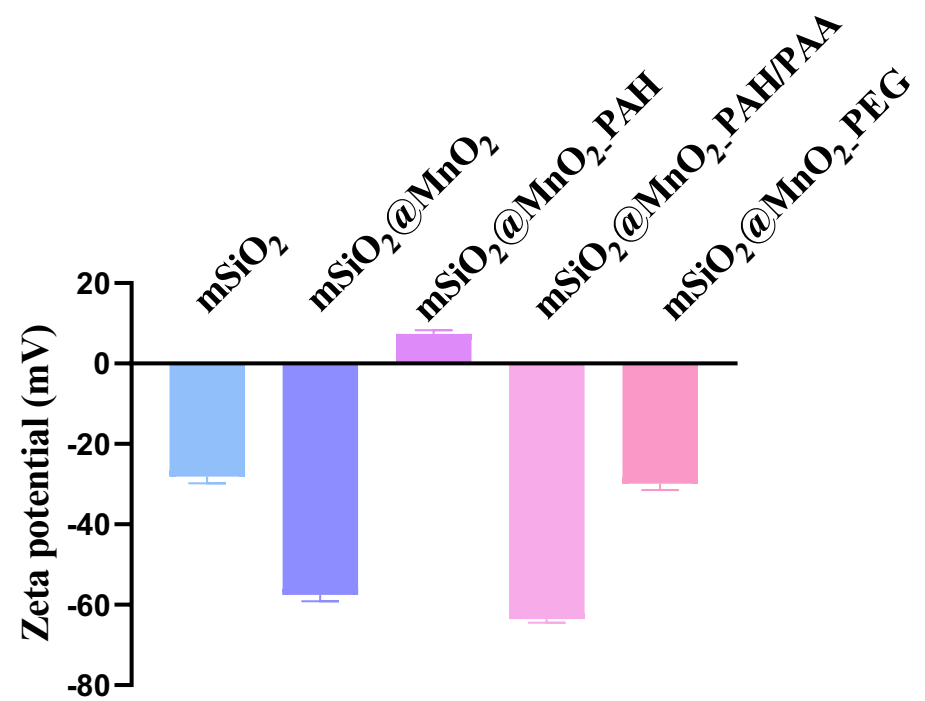

**Figure S3**

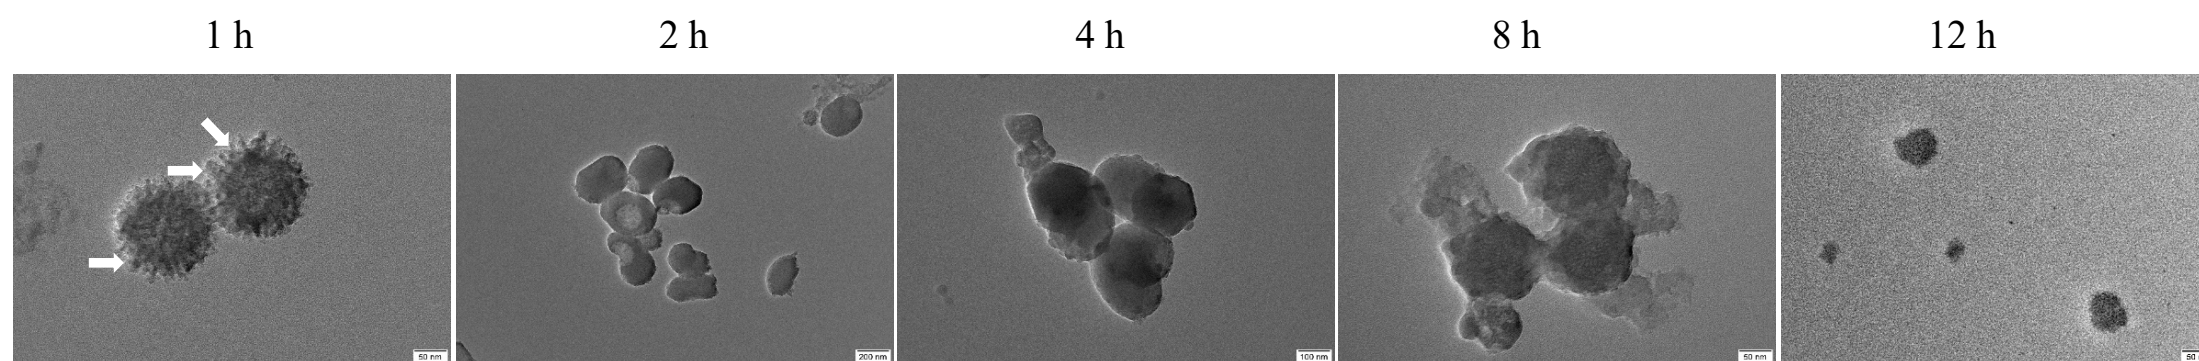

**Figure S4**

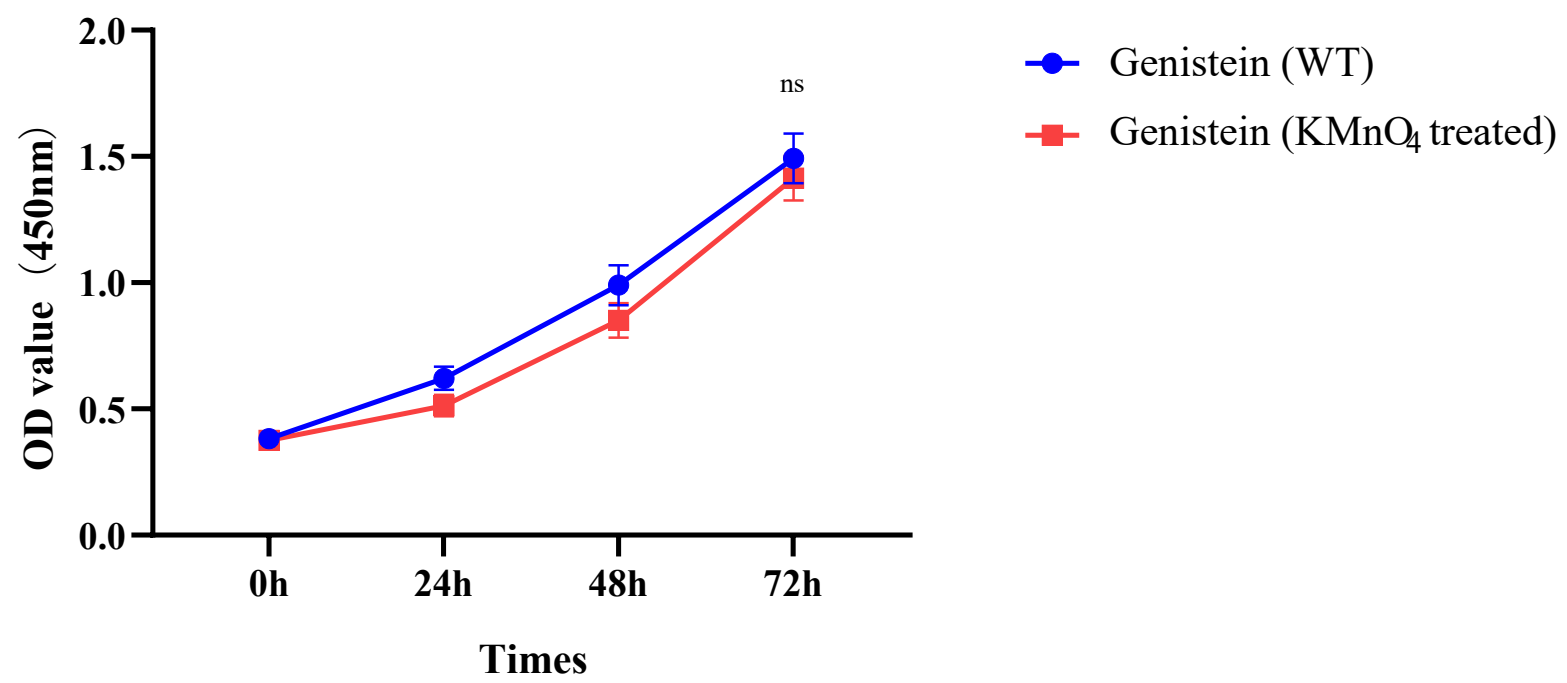

**Figure S5**

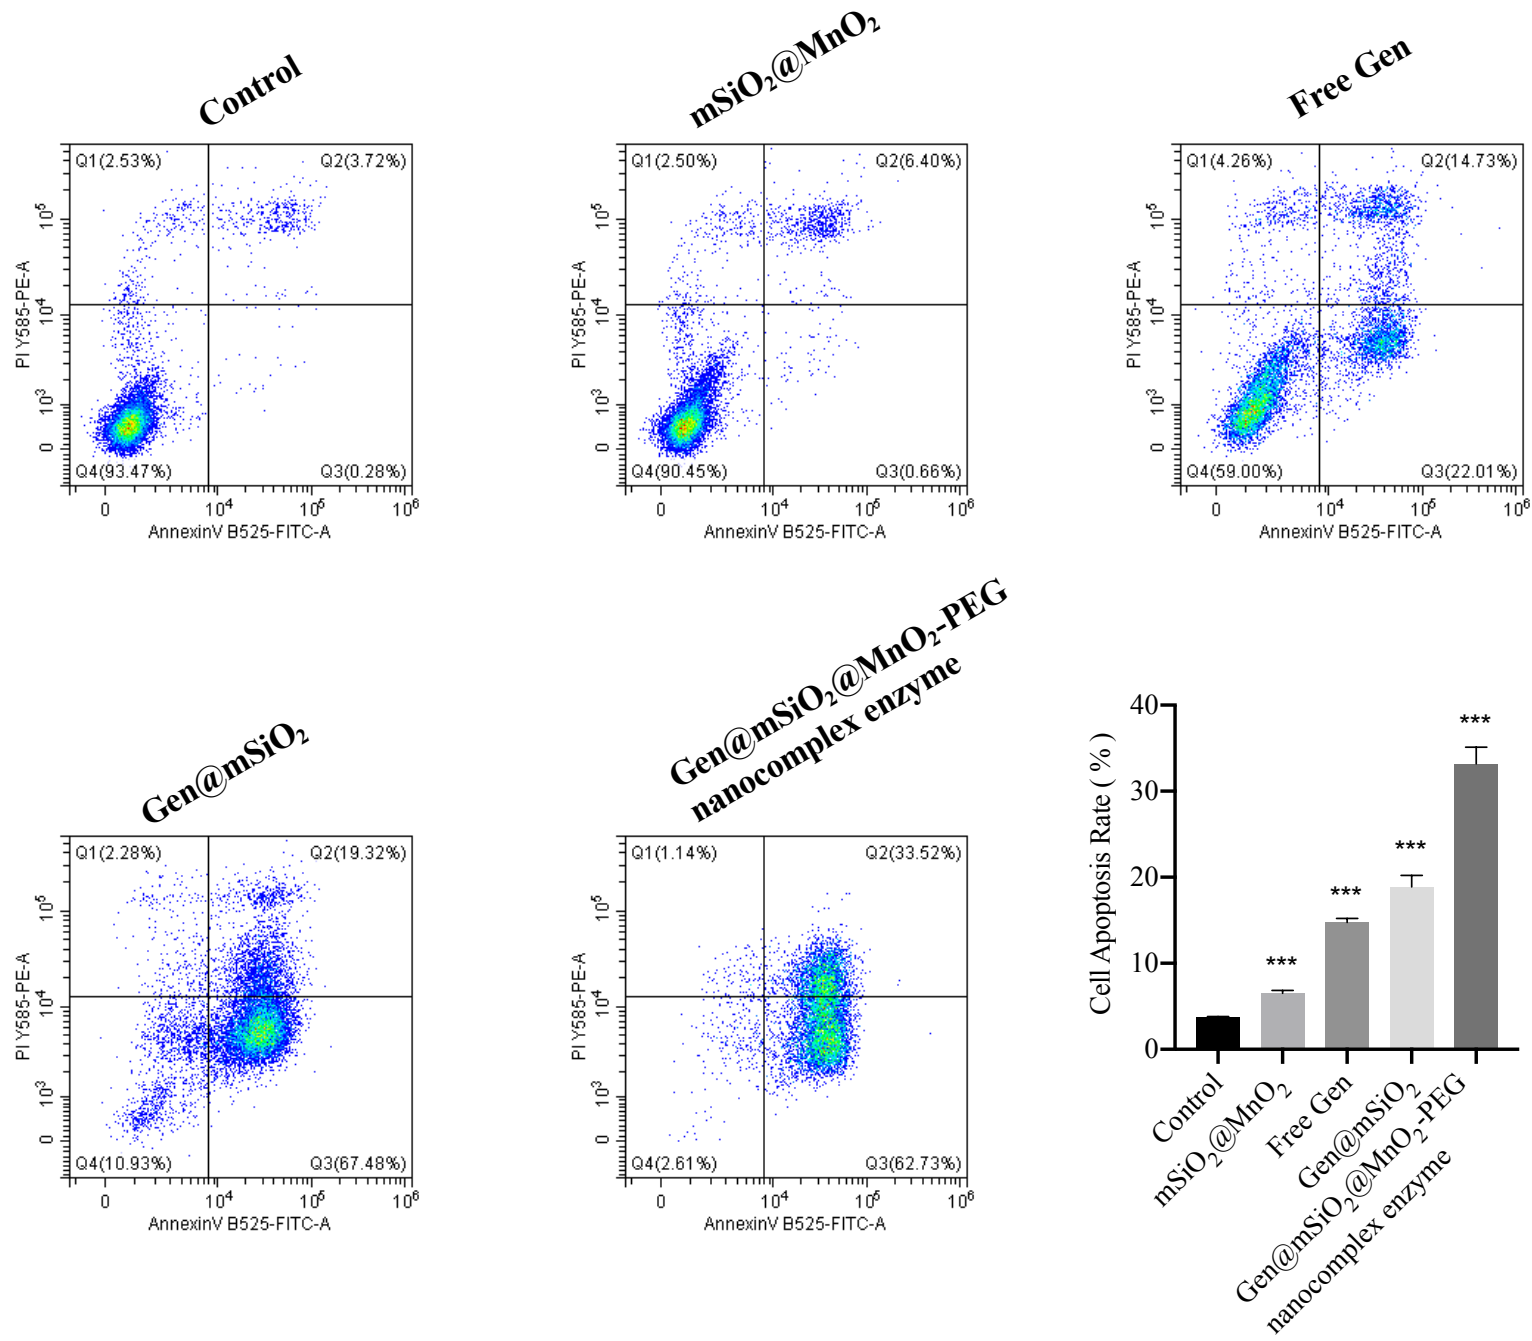

**Figure S6**

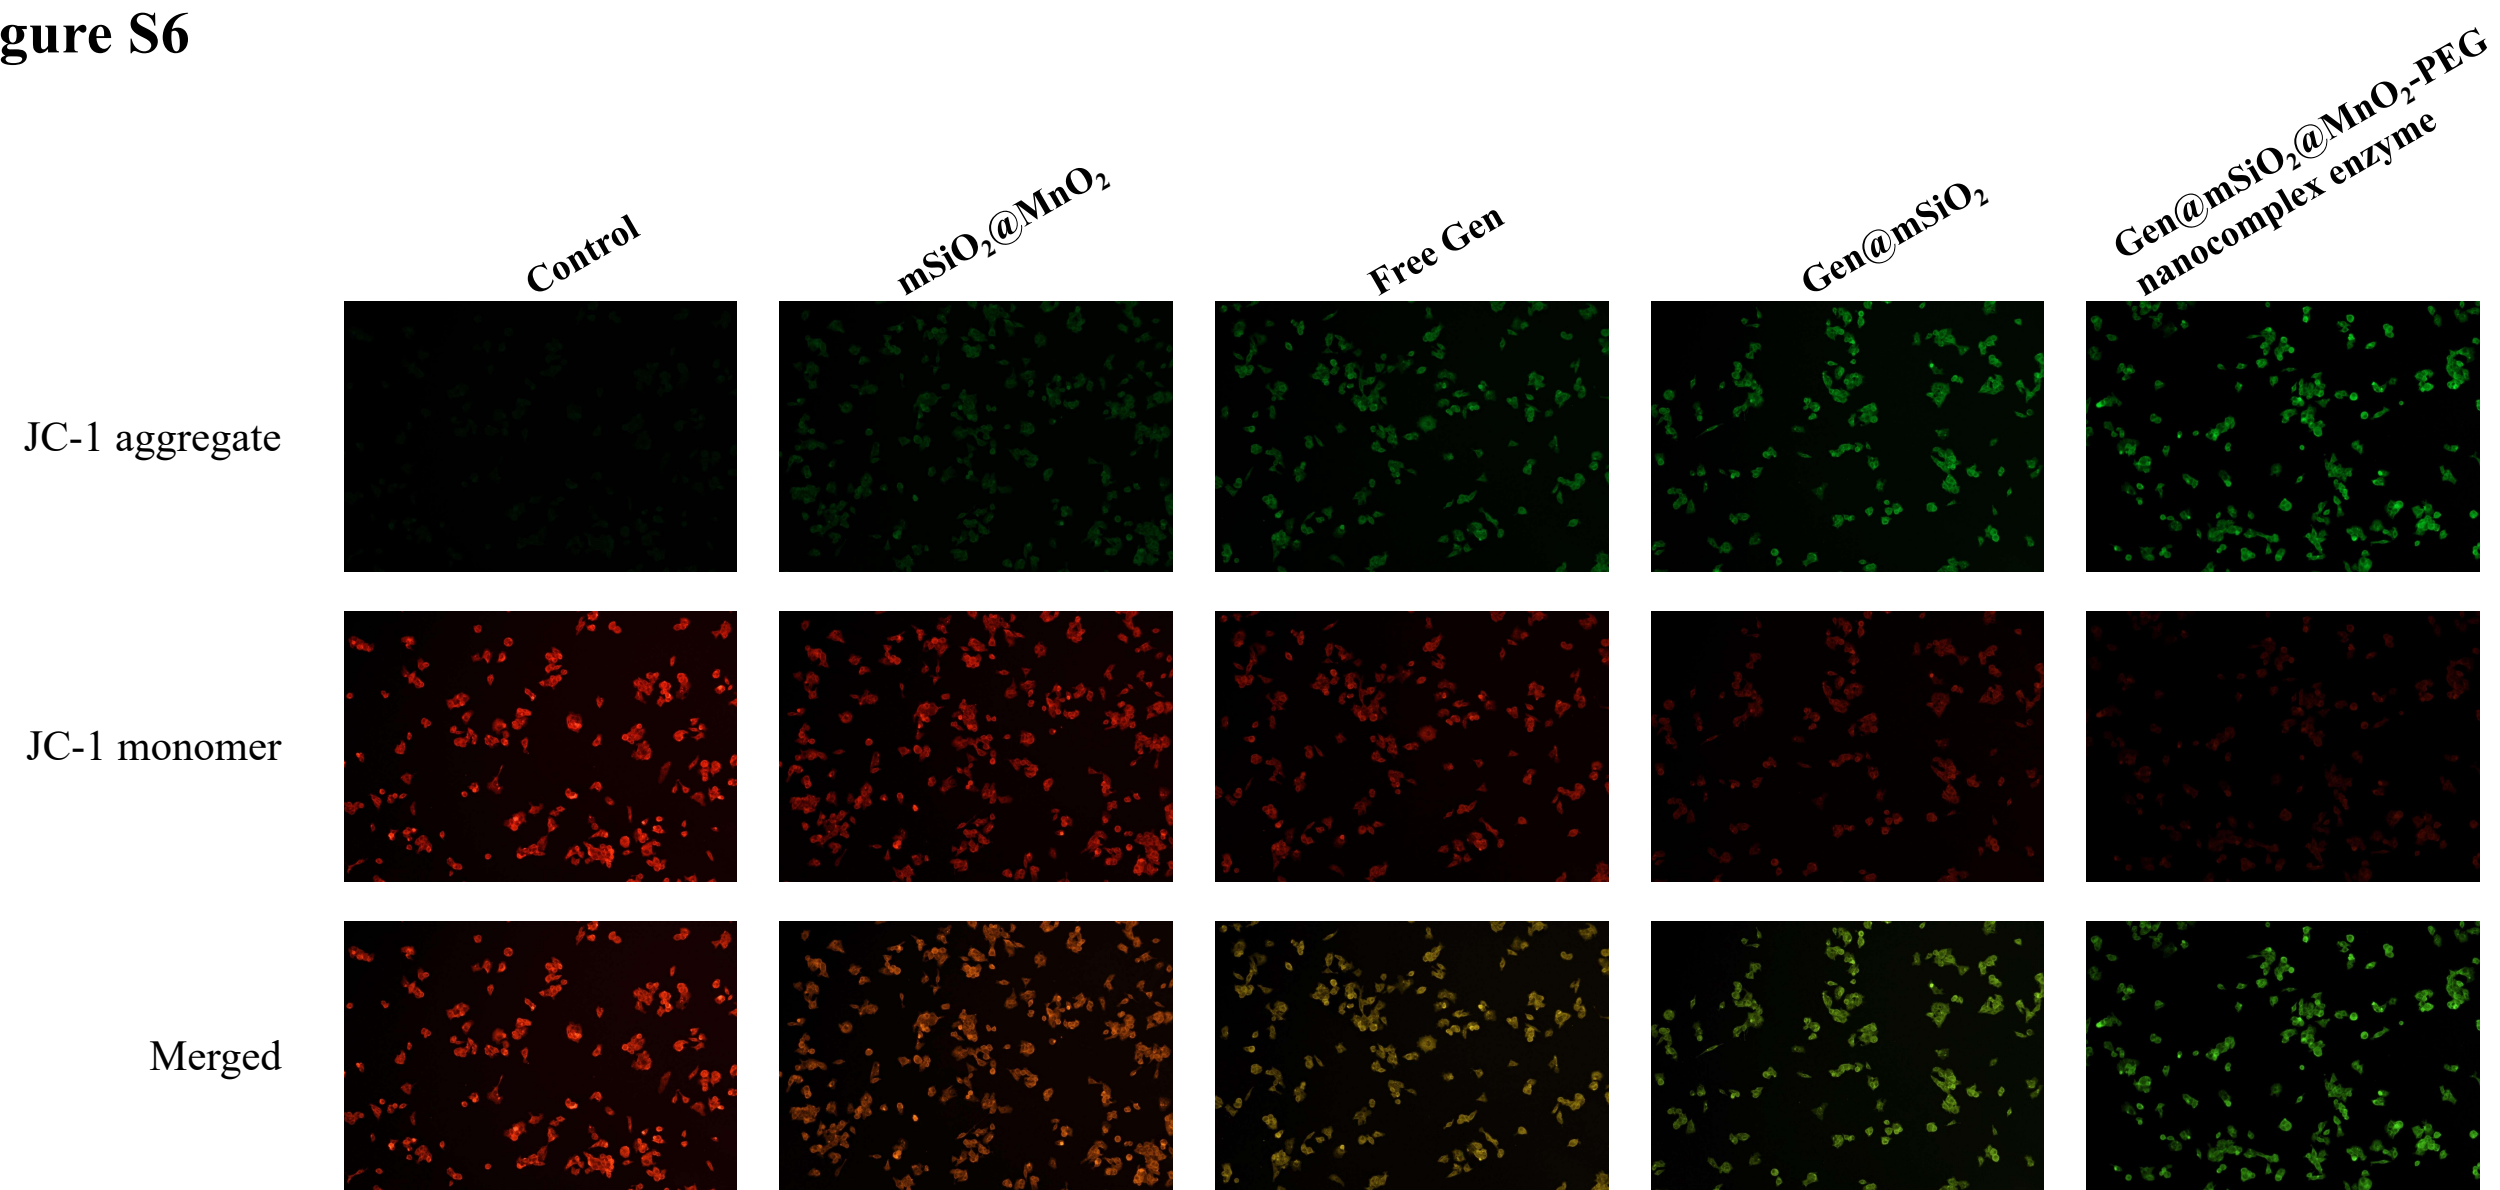

**Figure S7**

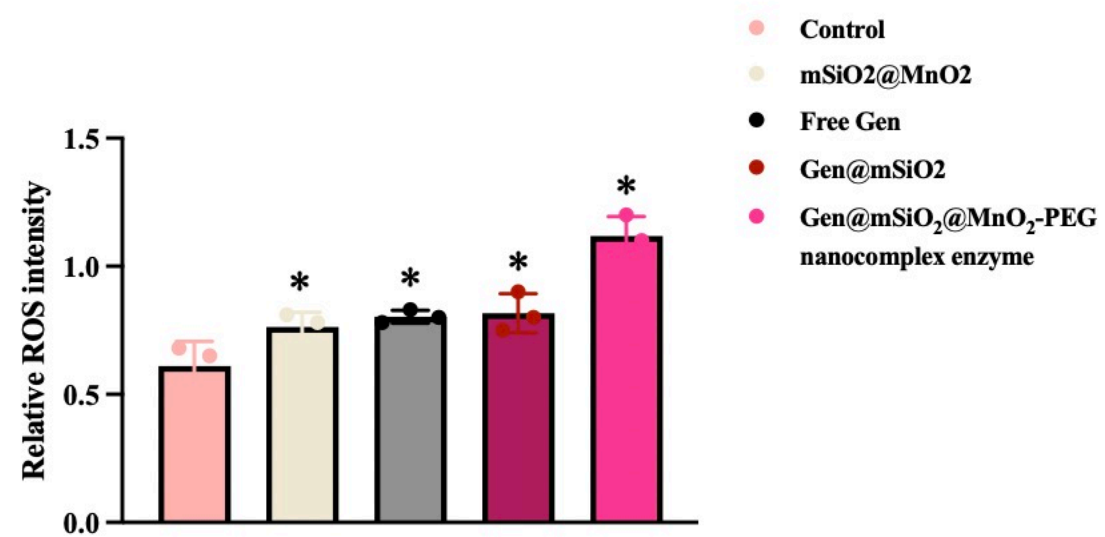

**Figure S8**

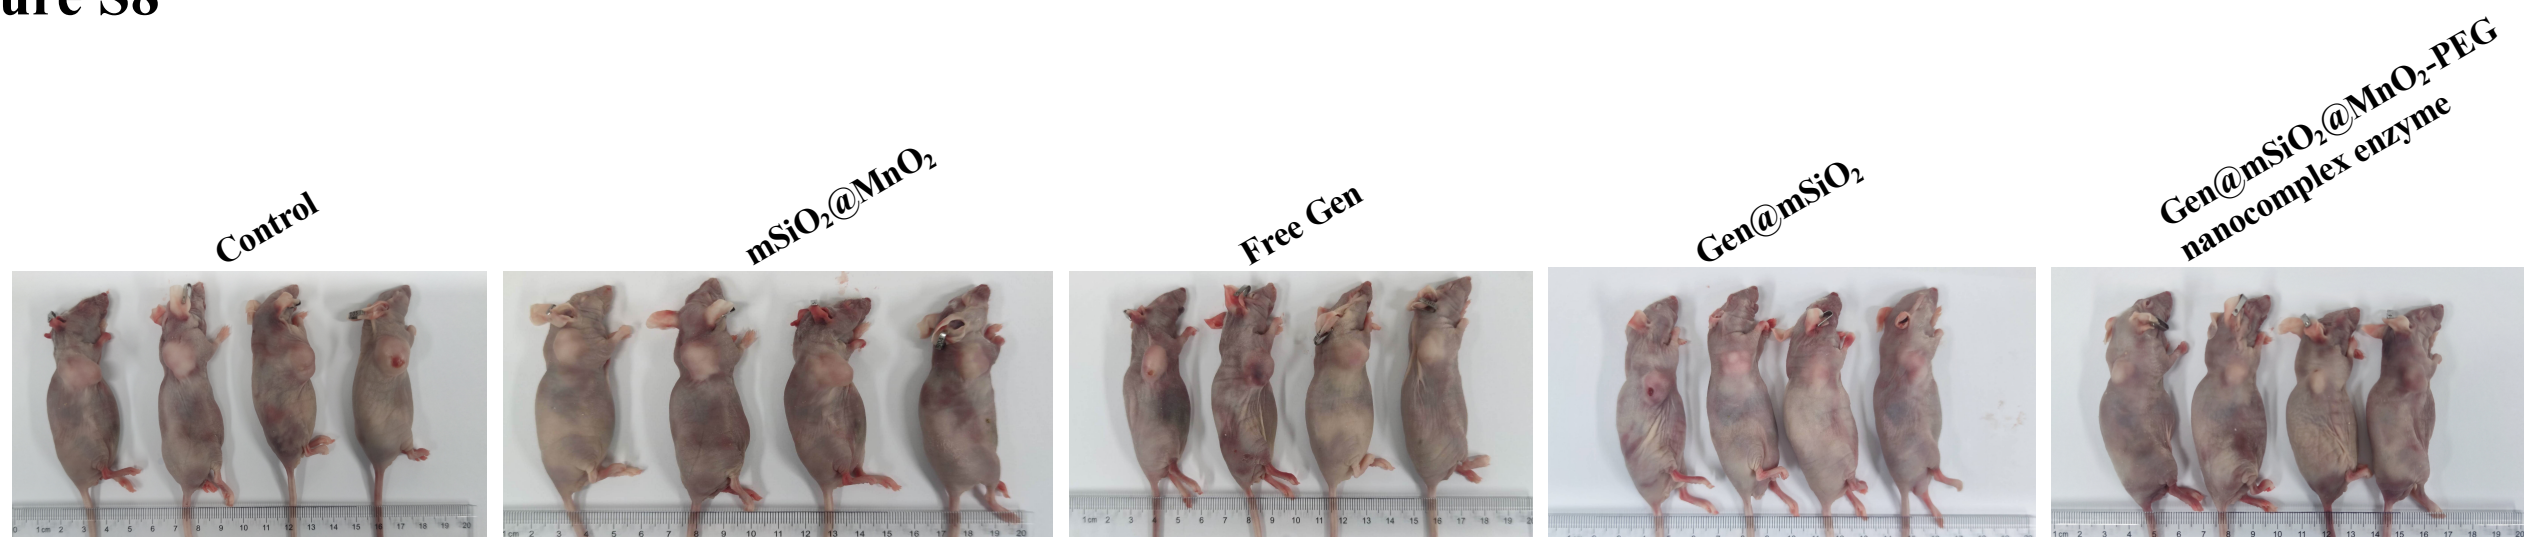

Supplement: d4nr02406k2.pdf [file d4nr02406k2.pdf]
